# Supplementary material for: One Year Monitoring of Ecological Interaction of Silurus glanis in a Novel Invaded Oligotrophic Deep Lake (Lake Maggiore)
Source: MDPI journal article supplement (doi:10.3390/w14010105), 2022-01-04
Supplement: s1 [file s1]

Archive with 1 entries (1 files):
- water-1487405-supplementary.pdf
