# Supplementary material for: One Year Monitoring of Ecological Interaction of Silurus glanis in a Novel Invaded Oligotrophic Deep Lake (Lake Maggiore)
Source: MDPI journal article supplement (doi:10.3390/w14010105), 2022-01-04
Supplement: s1 [file s1 › water-1487405-supplementary.pdf]

## Supplementary material S1

### *Sampling methods for littoral environment*

Bottom nets, varying in typology and mesh size were used to sampling the littoral environment. Generally, bottom nets have a rope of varying weight in the lower part which allows the nets to rest against the lake bottom preventing them from moving, while the upper part is free to move. Rings in stainless steel, or other metals, are used at the end of the net, fixed to the lead rope, for increasing stability of the net on the bottom of the lake. Once lowered into the water, its presence is signalled with a bout tied up at the net. In this study, three kinds of bottom nets were used.

- “*Voltana*” bottom net

Bottom net characterised by small meshes, 28 mm diameter, 0.12 mm yarn and 1.5 m height, design for *P. fluviatilis* fishing. Its use is allowed from 31<sup>st</sup> May to 15<sup>th</sup> December. This net allows catching small fish, between 18 and 30 cm. Specific to *S. glanis*, it is estimated this net is able to catch individuals from 25 cm length. This kind of net has been used 17 times, from 4<sup>th</sup> June till 11<sup>th</sup> November. A total of 5 nets, 84 m length, were set each time, reaching a total length of 420 m. They were lowered at a depth ranging between 3 m and 20 m (Table S1).

- “*Reet de pes bianc*” bottom net

A single layer bottom net characterized by meshes with a diameter greater than 45 mm and a height of maximum 50 meshes. This kind of net is forbidden during *Esox sp.* and *S. lucioperca* spawning season, from 15<sup>th</sup> March until 31<sup>st</sup> May. Four subcategories of this bottom net have been used, varying in diameter and height of the meshes: i) 3.5 m height with 70 mm diameter and 0.20 mm yarn, and ii) 2 m height with 70 mm diameter and 0.20 mm yarn, used together 21 times: a total of 4 nets, 280 m total length iii) 4 m height with 100 mm diameter and 0.25 mm yarn, used 23 times between 5 and 15 m water depth. iv) a 50 mm meshes and 100 m length net, used twice between 5 and 10 m water depth (Table S2).

Nets with 70 mm diameter meshes allow to capture fish from approximately 1.5 kg body weight, whilst nets with 100 mm diameter meshes are effective for fish of at least 4 kg till 15 kg body weight.

- “*Reet de bundela*” bottom net

Bottom nets with meshes of 34 mm and 43 mm diameter, and 75 meshes height, designed for fishing gangfisch (*Coregonus macrophthalmus*, Nüsslin, 1882) and lake char (*Salvelinus umbla*, L. 1758). These nets are mainly used during wintertime at very high depths, specifically used for looking for *Coregonus* sp.. The 34 mm diameter nets have been used 3 times, reaching 80 m depth, whilst the ones with 40 mm diameter were used twice, between 4 and 10 m water depth (Table S3).

#### *Sampling methods for pelagic environment*

Flying nets were used for pelagic sampling; these are suspended nets, free to move with the current. They have a leaded rope in the lower part and a neutral rope in the upper part. Polystyrene floats (20 cm x 10 cm x 5 cm) are tied to the neutral rope about every 20 m. The depth of descent is adjusted based on the length of the rope that joins the floats to the neutral rope. These types of nets are generally 1000 / 2000 meshes long and are tied together to form the so-called “brim”. They are lowered up to hundreds of meters from the coast very deep, and used to capture shad (*Alosa agone*, Scopoli 1786), trout (*Salmo trutta* complex) and gangfisch. Buoys are tied at the two ends with light signals for signalling their presence to navigators during night and for regaining the brim if the retreat of the nets begins before sunrise. In this study on one type of flying net was used.

#### *“Reet de bundela volante” flying net*

Flying net with 34 mm meshes, monofilament with 0.10 - 0.12 mm yarn and 150 mesh height; the use of the kind of net is forbidden during choregonides spawning period. This net is specific for catching gangfisch and whitefish (*Coregonus lavaretus*, L. 1758). Although these nets are conceived as gill nets, thus, given the size of the meshes, they should catch fish from 30-35 cm length, their

effectiveness on *Siluro glanis* (L., 1758) is based on its entanglement ability thanks to the protrusions of the body, such as fins and teeth. The considerable height of this net and the floating state, the fish often rolled up remaining limited in its movements, thus capture. However, since the yarns are thin, fish escape, breaking the net, it is not uncommon. This net was used 47 times between 10 to 40 m water depth (Table S4).

#### *Other captures methods*

In addition to the previously described nets, some *S. glanis* have been caught using amateur fishing gear:

- A 30-60 g power fishing rod with rotating reel and 0.18 mm braided nylon line, in which earth worms were used as bait. This technique was used on the 1<sup>st</sup> June 2019 (two specimen were caught, L3-L4), on the 29<sup>th</sup> July 2019 (specimen L21 caught) and on the 17<sup>th</sup> August 2029 (specimen L29 caught).
- A specific fishing rod for *S. glanis* fishing with a rotating reel and 0.45 mm braided nylon line, a rudd (*Scardinius erythrophthalmus*) of about 400 g was used as bait.
- A 30 cm diameter landing net equipped with a very tight mesh net for catching 0+ individuals. The search and capture of the small *S. glanis* took place at a depth of approximately 1 m on 8 October 2019. A total of 5 specimen were caught (L42-L43-L44-L45-L46).

**Table S1:** Details of littoral sampling through “voltana” nets. date of net lowering (d1) and time (t1), date of net withdrawal (d2) and time (t2), water depth and water temperature (T) are detailed.

| d1         | t1    | d2         | t2    | Depth (m) | T (°C) | <i>Alosa agone</i> | <i>Esox sp.</i> | <i>Gymnocephalus cernuus</i> | <i>Lepominus gibbosus</i> | <i>Perca fluviatilis</i> | <i>Rutilus rutilus</i> | <i>Sander lucioperca</i> | <i>Scardinius erythrophthalmus</i> | <i>Siluro glanis</i> |             |
|------------|-------|------------|-------|-----------|--------|--------------------|-----------------|------------------------------|---------------------------|--------------------------|------------------------|--------------------------|------------------------------------|----------------------|-------------|
|            |       |            |       |           |        |                    |                 |                              |                           |                          |                        |                          |                                    | Specimen             | ID          |
| 04/06/2019 | 18:00 | 05/06/2019 | 07:30 | 10-20     | 17     |                    |                 |                              | ✓                         | ✓                        | ✓                      | ✓                        |                                    | 0                    |             |
| 06/06/2019 | 19:00 | 07/06/2019 | 07:00 | 4-6       | 17.9   |                    |                 |                              |                           | ✓                        | ✓                      | ✓                        |                                    | 3                    | L9-L10-L11  |
| 18/06/2019 | 20:00 | 19/06/2019 | 07:30 | 4-15      | 18.3   | ✓                  |                 | ✓                            | ✓                         | ✓                        | ✓                      | ✓                        |                                    | 0                    |             |
| 16/07/2019 | 20:30 | 17/07/2019 | 00:30 | 4-15      | 22.2   |                    |                 |                              |                           | ✓                        | ✓                      | ✓                        |                                    | 2                    | L16-L17     |
| 25/07/2019 | 20:30 | 26/07/2019 | 07:00 | 5-10      | 25     |                    |                 |                              |                           | ✓                        | ✓                      | ✓                        |                                    | 0                    |             |
| 30/07/2019 | 21:00 | 31/07/2019 | 07:00 | 3-5       | 25.5   |                    |                 |                              |                           | ✓                        | ✓                      | ✓                        |                                    | 3                    | L23-L24-L25 |
| 13/08/2019 | 21:00 | 14/08/2019 | 01:00 | 3-5       | 23.7   |                    |                 |                              |                           | ✓                        | ✓                      | ✓                        |                                    | 1                    | L26         |
| 16/08/2019 | 21:00 | 17/08/2019 | 01:00 | 3-5       | Na     |                    |                 |                              |                           | ✓                        | ✓                      | ✓                        |                                    | 2                    | L27-L28     |
| 19/08/2019 | 21:00 | 20/08/2019 | 01:00 | 5-10      | 22.7   |                    |                 |                              | ✓                         | ✓                        | ✓                      | ✓                        |                                    | 2                    | L30-L31     |
| 21/08/2019 | 21:00 | 22/08/2019 | 01:00 | 5-10      | 23.2   |                    |                 |                              |                           | ✓                        | ✓                      | ✓                        |                                    | 2                    | L33-L32     |
| 27/08/2019 | 21:00 | 28/08/2019 | 01:00 | 5-10      | 22.8   |                    | ✓               |                              |                           | ✓                        | ✓                      | ✓                        |                                    | 3                    | L34-L35-L36 |

|            |       |            |       |       |      |   |   |   |   |   |   |   |   |         |
|------------|-------|------------|-------|-------|------|---|---|---|---|---|---|---|---|---------|
| 29/08/2019 | 21:00 | 30/08/2019 | 01:00 | 5-10  | Na   |   |   |   | ✓ | ✓ | ✓ | ✓ | 2 | L37-L38 |
| 08/09/2019 | 20:00 | 09/09/2019 | 01:00 | 5-10  | 22.5 |   |   |   | ✓ | ✓ | ✓ | ✓ | 1 | L39     |
| 13/09/2019 | 19:00 | 14/09/2019 | 06:30 | 5-10  | 22.5 | ✓ | ✓ |   | ✓ | ✓ | ✓ |   | 0 |         |
| 23/10/2019 | 17:00 | 24/10/2019 | 07:00 | 5-15  | 18   | ✓ | ✓ |   | ✓ | ✓ | ✓ |   | 2 | L49-L50 |
| 06/11/2019 | 17:00 | 07/11/2019 | 08:00 | 15-20 | 13.2 |   | ✓ | ✓ | ✓ | ✓ | ✓ |   | 0 |         |
| 11/11/2019 | 16:00 | 12/11/2019 | 08:00 | 15-20 | 13   |   |   |   | ✓ | ✓ | ✓ |   | 0 |         |

**Table S2:** Details of littoral sampling through “Reet de pes blanc” nets. Date of net lowering (d1) and time (t1), date of net withdrawal (d2) and time (t2), water depth and water temperature (T) are detailed.

[illegible]

|            |       |            |       |      |      |   |   |   |         |
|------------|-------|------------|-------|------|------|---|---|---|---------|
| 04/10/2019 | 18:00 | 05/10/2019 | 07:00 | 4-10 | 19   |   |   | 0 |         |
| 08/10/2019 | 18:00 | 09/10/2019 | 07:15 | 4-10 | 18.7 |   | ✓ | 0 |         |
| 17/10/2019 | 17:30 | 18/10/2019 | 07:15 | 4-10 | 18.5 | ✓ |   | 2 | L47-L48 |
| 29/10/2019 | 17:00 | 30/10/2019 | 06:30 | 4-10 | 16   |   |   | 0 |         |
| 06/11/2019 | 17:00 | 07/11/2019 | 08:00 | 4-10 | 13.2 | ✓ | ✓ | 0 |         |

*Third subcategory of net (100 mm diameter)*

| d1         | t1    | d2         | t2    | Depth (m) | T (°C) |   |   |   |             |
|------------|-------|------------|-------|-----------|--------|---|---|---|-------------|
| 05/02/2019 | 17:00 | 06/02/2019 | 12:00 | 8-15      | 7.3    | ✓ |   | 0 |             |
| 05/03/2019 | 16:30 | 06/03/2019 | 12:00 | 8-15      | 8.3    |   |   | 0 |             |
| 14/03/2019 | 16:00 | 15/03/2019 | 10:00 | 8-15      | 8.1    |   |   | 0 |             |
| 04/06/2019 | 18:00 | 05/06/2019 | 07:30 | 6-8       | 17     |   |   | 0 |             |
| 18/06/2019 | 20:00 | 19/06/2019 | 07:30 | 6-8       | 18.3   |   |   | 0 |             |
| 27/06/2019 | 20:30 | 28/06/2019 | 07:00 | 5-8       | 19.8   |   |   | 3 | L12-L13-L14 |
| 01/07/2019 | 20:30 | 02/07/2019 | 07:00 | 6-8       | 19.6   | ✓ |   | 1 | L15         |
| 10/07/2019 | 20:30 | 11/07/2019 | 07:00 | 5-10      | Na     |   |   | 0 |             |
| 19/07/2019 | 21:00 | 20/07/2019 | 06:30 | 5-10      | 23.4   |   |   | 0 |             |
| 30/07/2019 | 21:00 | 31/07/2019 | 07:00 | 5-7       | 25.5   |   | ✓ | 1 | L22         |
| 13/08/2019 | 21:00 | 14/08/2019 | 01:00 | 5-10      | 23.7   |   |   | 0 |             |
| 16/08/2019 | 21:00 | 17/08/2019 | 01:00 | 5-10      | Na     |   |   | 0 |             |
| 19/08/2019 | 21:00 | 20/08/2019 | 01:00 | 5-10      | 22.7   |   |   | 0 |             |
| 27/08/2019 | 21:00 | 28/08/2019 | 01:00 | 5-10      | 22.8   |   |   | 0 |             |
| 29/08/2019 | 21:00 | 30/08/2019 | 01:00 | 5-10      | Na     |   |   | 0 |             |
| 08/09/2019 | 20:00 | 09/09/2019 | 01:00 | 5-10      | 22.5   |   |   | 0 |             |
| 13/09/2019 | 19:00 | 14/09/2019 | 06:30 | 5-10      | 22     |   |   | 0 |             |
| 26/09/2019 | 19:00 | 27/09/2019 | 07:00 | 5-10      | 21.5   |   |   | 0 |             |

|            |       |            |       |      |      |   |   |
|------------|-------|------------|-------|------|------|---|---|
| 04/10/2019 | 18:00 | 05/10/2019 | 07:00 | 5-10 | 19   |   | 0 |
| 08/10/2019 | 18:00 | 09/10/2019 | 07:15 | 5-10 | 18.7 |   | 0 |
| 17/10/2019 | 17:30 | 18/10/2019 | 07:15 | 5-10 | 18.5 |   | 0 |
| 29/10/2019 | 17:00 | 30/10/2019 | 06:30 | 5-10 | 16   |   | 0 |
| 06/11/2019 | 17:00 | 07/11/2019 | 08:00 | 5-10 | 13.2 | ✓ | 0 |

---

*Fourth subcategory of net (50 mm diameter)*

| d1         | t1    | d2         | t2    | Depth (m) | T (°C) |   |   |
|------------|-------|------------|-------|-----------|--------|---|---|
| 04/10/2019 | 18:00 | 05/10/2019 | 07:00 | 5-10      | 19     | ✓ | 0 |
| 17/10/2019 | 17:30 | 18/10/2019 | 07:15 | 5-10      | 18.5   | ✓ | 0 |

---

**Table S3:** Details of littoral sampling through “Reet de bundela” nets. Date of net lowering (d1) and time (t1), date of net withdrawal (d2) and time (t2), water depth and water temperature (T) are detailed.

| d1         | t1    | d2         | t2    | Depth (m) | T (°C) | <i>Coregonus</i> sp. | <i>Esox</i> sp. | <i>Lota lota</i> | <i>Perca fluviatilis</i> | <i>Rutilus rutilus</i> | <i>Sander lucioperca</i> | <i>Siluro glanis</i> |     |
|------------|-------|------------|-------|-----------|--------|----------------------|-----------------|------------------|--------------------------|------------------------|--------------------------|----------------------|-----|
|            |       |            |       |           |        |                      |                 |                  |                          |                        |                          | Specimen             | ID  |
| 30/01/2019 | 17:00 | 01/02/2019 | 12:00 | 30-80     | 7.2    | ✓                    |                 | ✓                |                          |                        |                          | 0                    |     |
| 20/02/2019 | 18:00 | 21/02/2019 | 18:00 | 25-70     | 8.7    | ✓                    |                 | ✓                | ✓                        |                        |                          | 1                    | L2  |
| 05/03/2019 | 16:30 | 06/03/2019 | 12:00 | 20-30     | 8.3    |                      | ✓               |                  | ✓                        | ✓                      | ✓                        | 0                    |     |
| 19/07/2019 | 21:00 | 20/07/2019 | 06:30 | 4-7       | 23.4   |                      |                 |                  |                          | ✓                      |                          | 1                    | L20 |
| 26/09/2019 | 19:00 | 27/09/2019 | 07:00 | 5-10      | 21.5   |                      |                 |                  | ✓                        | ✓                      | ✓                        | 1                    | L40 |

**Table S4:** Details of pelagic sampling through “Reet de bundela volante” nets. Date of net lowering (d1) and time (t1), date of net withdrawal (d2) and time (t2), water depth and water temperature (T) are detailed.

| d1         | t1    | d2         | t2    | Depth (m) | T (°C) | <i>Alosa agone</i> | <i>Coregonus</i> sp. | <i>Salmo trutta</i><br>complex | <i>Sander</i> | <i>Lucioperca</i> | <i>Rutilus rutilus</i> | <i>Siluro glanis</i> |                    |
|------------|-------|------------|-------|-----------|--------|--------------------|----------------------|--------------------------------|---------------|-------------------|------------------------|----------------------|--------------------|
|            |       |            |       |           |        |                    |                      |                                |               |                   |                        | Specimen             | ID                 |
| 12/03/2019 | 17:00 | 13/03/2019 | 06:00 | 25-35     | Na     | ✓                  | ✓                    |                                |               |                   |                        | 0                    |                    |
| 14/03/2019 | 17:00 | 15/03/2019 | 06:00 | 25-35     | 8.1    | ✓                  | ✓                    |                                |               |                   |                        | 4                    | P1-P2-P3-P4        |
| 18/03/2019 | 17:00 | 19/03/2019 | 06:00 | 25-35     | 9      | ✓                  | ✓                    |                                |               |                   |                        | 0                    |                    |
| 20/03/2019 | 17:00 | 21/03/2019 | 06:00 | 22-32     | 9      | ✓                  | ✓                    |                                |               |                   |                        | 6                    | P5-P6-P7-P8-P9-P10 |
| 22/03/2019 | 17:00 | 23/03/2019 | 06:00 | 22-32     | 9.1    | ✓                  | ✓                    |                                |               |                   |                        | 4                    | P11-P12-P13-P14    |
| 29/03/2019 | 17:00 | 30/03/2019 | 06:00 | 22-32     | 9.6    | ✓                  | ✓                    |                                |               |                   |                        | 1                    | P15                |
| 05/04/2019 | 18:00 | 06/04/2019 | 07:00 | 22-32     | 9.8    |                    | ✓                    |                                |               |                   |                        | 0                    |                    |
| 08/04/2019 | 18:00 | 09/04/2019 | 07:00 | 22-32     | 10.2   |                    | ✓                    |                                | ✓             |                   | ✓                      | 0                    |                    |
| 11/04/2019 | 18:00 | 12/04/2019 | 07:00 | 22-32     | 11.9   | ✓                  | ✓                    |                                |               |                   |                        | 0                    |                    |
| 12/04/2019 | 18:00 | 13/04/2019 | 07:00 | 22-32     | 12     |                    | ✓                    |                                |               |                   | ✓                      | 0                    |                    |
| 17/04/2019 | 18:00 | 18/04/2019 | 07:00 | 12_22     | 12.2   |                    | ✓                    | ✓                              |               |                   |                        | 1(2*)                | P16                |
| 18/04/2019 | 18:00 | 19/04/2019 | 07:00 | 30-40     | 12.2   | ✓                  | ✓                    |                                |               |                   |                        | 0                    |                    |
| 26/04/2019 | 18:00 | 27/04/2019 | 07:00 | 30-40     | 10.9   |                    | ✓                    |                                |               |                   |                        | 0                    |                    |
| 30/04/2019 | 18:00 | 01/05/2019 | 07:00 | 25-35     | 13.7   |                    | ✓                    |                                |               |                   |                        | 0                    |                    |
| 06/05/2019 | 18:00 | 07/05/2019 | 07:00 | 25-35     | 14.8   | ✓                  | ✓                    |                                |               |                   |                        | 1                    | P17                |
| 08/05/2019 | 18:00 | 09/05/2019 | 07:00 | 25-35     | 15.2   | ✓                  | ✓                    |                                |               |                   |                        | 0                    |                    |
| 14/05/2019 | 18:00 | 15/05/2019 | 07:00 | 15-25     | 15.7   | ✓                  | ✓                    |                                |               |                   |                        | 1                    | P18                |

|            |       |            |       |       |      |   |   |   |   |   |
|------------|-------|------------|-------|-------|------|---|---|---|---|---|
| 16/05/2019 | 18:00 | 17/05/2019 | 07:00 | 15-25 | 15.7 | ✓ | ✓ |   |   | 0 |
| 22/05/2019 | 18:00 | 23/05/2019 | 07:00 | 15-25 | 16.1 | ✓ | ✓ |   |   | 0 |
| 23/05/2019 | 18:00 | 24/05/2019 | 07:00 | 15-25 | 16.2 | ✓ | ✓ | ✓ |   | 0 |
| 28/05/2019 | 18:00 | 29/05/2019 | 07:00 | 25-35 | Na   |   | ✓ |   |   | 0 |
| 07/06/2019 | 18:00 | 08/06/2020 | 05:30 | 15-25 | 17.9 | ✓ | ✓ |   |   | 0 |
| 13/06/2019 | 18:00 | 14/06/2019 | 05:30 | 15-25 | 18.1 | ✓ | ✓ |   |   | 0 |
| 18/06/2019 | 18:00 | 19/06/2019 | 05:30 | 8-18  | 18.3 | ✓ | ✓ | ✓ | ✓ | 0 |
| 27/06/2019 | 18:00 | 28/06/2019 | 05:30 | 10-20 | 19.8 | ✓ | ✓ |   | ✓ | 0 |
| 01/07/2019 | 18:00 | 02/07/2019 | 05:30 | 10-20 | 19.6 | ✓ | ✓ |   |   | 0 |
| 10/07/2019 | 18:00 | 11/07/2019 | 05:30 | 10-20 | Na   | ✓ | ✓ |   |   | 1 |
| 16/07/2019 | 18:00 | 17/07/2019 | 05:30 | 10-20 | 22.2 | ✓ | ✓ |   |   | 0 |
| 17/07/2019 | 18:00 | 18/07/2019 | 05:30 | 10-20 | 23   |   | ✓ |   |   | 0 |
| 19/07/2019 | 18:00 | 20/07/2019 | 05:30 | 10-20 | 23.4 |   | ✓ |   |   | 0 |
| 25/07/2019 | 18:00 | 26/07/2019 | 05:30 | 10-20 | 25   | ✓ | ✓ | ✓ |   | 0 |
| 30/07/2019 | 18:00 | 31/07/2019 | 05:30 | 10-20 | 25.5 |   | ✓ |   |   | 0 |
| 13/08/2019 | 18:00 | 14/08/2019 | 05:30 | 10-20 | 23.7 |   | ✓ |   |   | 0 |
| 16/08/2019 | 19:00 | 17/08/2019 | 05:30 | 10-20 | Na   | ✓ | ✓ |   |   | 0 |
| 21/08/2019 | 19:00 | 22/08/2019 | 05:30 | 15-25 | 23.2 | ✓ | ✓ |   |   | 0 |
| 27/08/2019 | 19:00 | 28/08/2019 | 05:30 | 15-25 | 22.8 | ✓ | ✓ |   |   | 0 |
| 29/08/2019 | 19:00 | 30/08/2019 | 05:30 | 15-25 | Na   |   | ✓ |   |   | 0 |
| 13/09/2019 | 19:00 | 14/09/2019 | 05:30 | 15-25 | 22   |   | ✓ |   |   | 0 |
| 26/09/2019 | 18:00 | 27/09/2019 | 05:30 | 15-25 | 21.5 |   | ✓ |   |   | 0 |
| 04/10/2019 | 18:00 | 05/10/2019 | 05:30 | 15-25 | 19   | ✓ | ✓ |   | ✓ | 0 |
| 08/10/2019 | 17:30 | 09/10/2019 | 06:00 | 15-25 | 18.7 |   | ✓ |   |   | 0 |

P19

|            |       |            |       |       |      |     |   |         |
|------------|-------|------------|-------|-------|------|-----|---|---------|
| 17/10/2019 | 17:00 | 18/10/2019 | 06:30 | 18-28 | 18.5 | ✓   | 0 |         |
| 23/10/2019 | 17:00 | 24/10/2019 | 06:30 | 18-28 | 18   | ✓   | 0 |         |
| 29/10/2019 | 17:00 | 30/10/2019 | 06:30 | 18-28 | 16   | ✓ ✓ | 1 | P20     |
| 04/11/2019 | 16:00 | 05/11/2019 | 06:30 | 18-28 | Na   | ✓   | 2 | P21-P22 |
| 06/11/2019 | 16:00 | 07/11/2019 | 06:30 | 18-28 | 13.2 | ✓   | 0 |         |
| 11/11/2019 | 16:00 | 12/11/2019 | 07:00 | 18-28 | 13   | ✓ ✓ | 1 | P23     |
